# Supplementary material for: Heterologous Ferredoxin Reductase and Flavodoxin Protect Cos-7 Cells from Oxidative Stress
Source: PubMed Central journal article supplement (PMC2957446; doi:10.1371/journal.pone.0013501), 2010-10-19
Supplement: pone.0013501.s003.pdf [file pone.0013501.s003.pdf]

A

pFNR

AAGCTTGCTGGTTGCACTTCTCAGCC ATG GCT CCT CGC TGC TGG CAC TGG TGG CGC TGG TCC  
 GCG TGG TCT GGG CTT CGG CCG TCT CCC TCC AGG AGC ACT CCG ACC CCA GGC TTC TGC  
 CAG AAG TTC TCC ACA CAG GAG AGA GCT CAG GTT ACT ACT GAG GCA CCT GCT AAG GTA  
 GTA AAG CAT TCA AAG AAA CAA GAT GAA AAT ATT GTT GTG AAC AAG TTC AAA CCT AAG  
 GAA CCA TAC GTT GGG AGG TGT CTT CTC AAC ACA AAG ATC ACT GGT GAT GAT GCA CCT  
 GGT GAA ACT TGG CAC ATG GTT TTC AGC ACT GAG GGA GAG GTT CCT TAC AGA GAA GGA  
 CAA TCT ATT GGG ATA GTT CCT GAC GGT ATT GAC AAG AAT GGC AAG CCT CAC AAG CTG  
 AGA TTG TAT TCA ATT GCT AGC AGT GCC ATT GGT GAT TTT GGA GAC TCC AAA ACT GTT  
 TCC CTA TGT GTG AAA CGT CTT GTT TAC ACA AAC GAT GCC GGA GAA GTT GTT AAG GGA  
 GTT TGC TCA AAT TTC TTG TGC GAT TTG AAG CCG GGA TCA GAA GTA AAG ATT ACT GGA  
 CCA GTT GGT AAA GAA ATG CTT ATG CCA AAA GAT CCT AAT GCT ACT GTC ATC ATG TTG  
 GGA ACT GGA ACT GGA ATC GCC CCA TTT CGC TCA TTT TTA TGG AAA ATG TTC TTT GAG  
 AAG CAT GAA GAT TAC CAG TTC AAT GGT TTG GCA TGG CTC TTC CTA GGT GTC CCT ACA  
 AGC AGC TCA CTG CTT TAT AAG GAG GAA TTT GAA AAG ATG AAG GAG AAA GCA CCC GAG  
 AAC TTC AGG CTT GAC TTT GCT GTA AGC AGA GAG CAA GTA AAC GAT AAA GGA GAG AAA  
 ATG TAC ATC CAA ACA AGA ATG GCT CAA TAC GCC GAA GAG TTA TGG GAA TTA CTG AAG  
 AAA GAC AAC ACT TTT GTT TAC ATG TGT GGA CTG AAA GGA ATG GAA AAG GGA ATT GAT  
 GAC ATA ATG GTG TCA CTC GCT GCC AAA GAC GGC ATC GAT TGG ATC GAG TAC AAG AGA  
 ACG TTG AAG AAG GCG GAG CAA TGG AAC GTT GAA GTC TAT TAA TTTCTTTTCACTTGCATTG  
 ATAACAAGTTCCAGTTTGTGCAGCAGCTTATCTATATCACCCCTCCTGTATTCTGTAGATAGATTACATTACAACC  
 TTGTAATTTTGGTATGACAAAAAATTATACCTTGGCTTGTGAACAATATTGTTTACGGAATCGTTGCAAGAAATAA  
 TTTTGGAGATCATGCAATATAGTTTATCAATTTCTGAAATTTAATTGTAATCCGAATTC

B

pF1d

AAGCTTGCTGGTTGCACTTCTCAGCC ATG GCT CCT CGC TGC TGG CAC TGG TGG CGC TGG TCC  
 GCG TGG TCT GGG CTT CGG CCG TCT CCC TCC AGG AGC ACT CCG ACC CCA GGC TTC TGC  
 CAG AAG TTC TCC ACA CAG GAG AGA GCT CTC ATA ATG TCA AAG AAA ATT GGT TTA TTC  
 TAC GGT ACT CAA ACT GGT AAA ACT GAA TCA GTA GCA GAA ATC ATT CGA GAC GAG TTT  
 GGT AAT GAT GTG GTG ACA TTA CAC GAT GTT TCC CAG GCA GAA GTA ACT GAC TTG AAT  
 GAT TAT CAA TAT TTG ATT ATT GGC TGT CCT ACT TGG AAT ATT GGC GAA CTG CAA AGC  
 GAT TGG GAA GGA CTC TAT TCA GAA CTG GAT GAT GTA GAT TTT AAT GGT AAA TTG GTT  
 GCC TAC TTT GGG ACT GGT GAC CAA ATA GGT TAC GCA GAT AAT TTT CAG GAT GCG ATC  
 GGT ATT TTG GAA GAA AAA ATT TCT CAA CGT GGT GGT AAA ACT GTC GGC TAT TGG TCA  
 ACT GAT GGA TAT GAT TTT AAT GAT TCC AAG GCA CTA AGA AAT GGC AAG TTT GTA GGA  
 CTA GCT CTT GAT GAA GAT AAT CAA TCT GAC TTA ACA GAC GAT CGC ATC AAA AGT TGG  
 GTT GCT CAA TTA AAG TCT GAA TTT GGT TTG TAA AAAGAATTC
