# Supplementary material for: Heterologous Ferredoxin Reductase and Flavodoxin Protect Cos-7 Cells from Oxidative Stress
Source: PubMed Central journal article supplement (PMC2957446; doi:10.1371/journal.pone.0013501), 2010-10-19

Figure S4

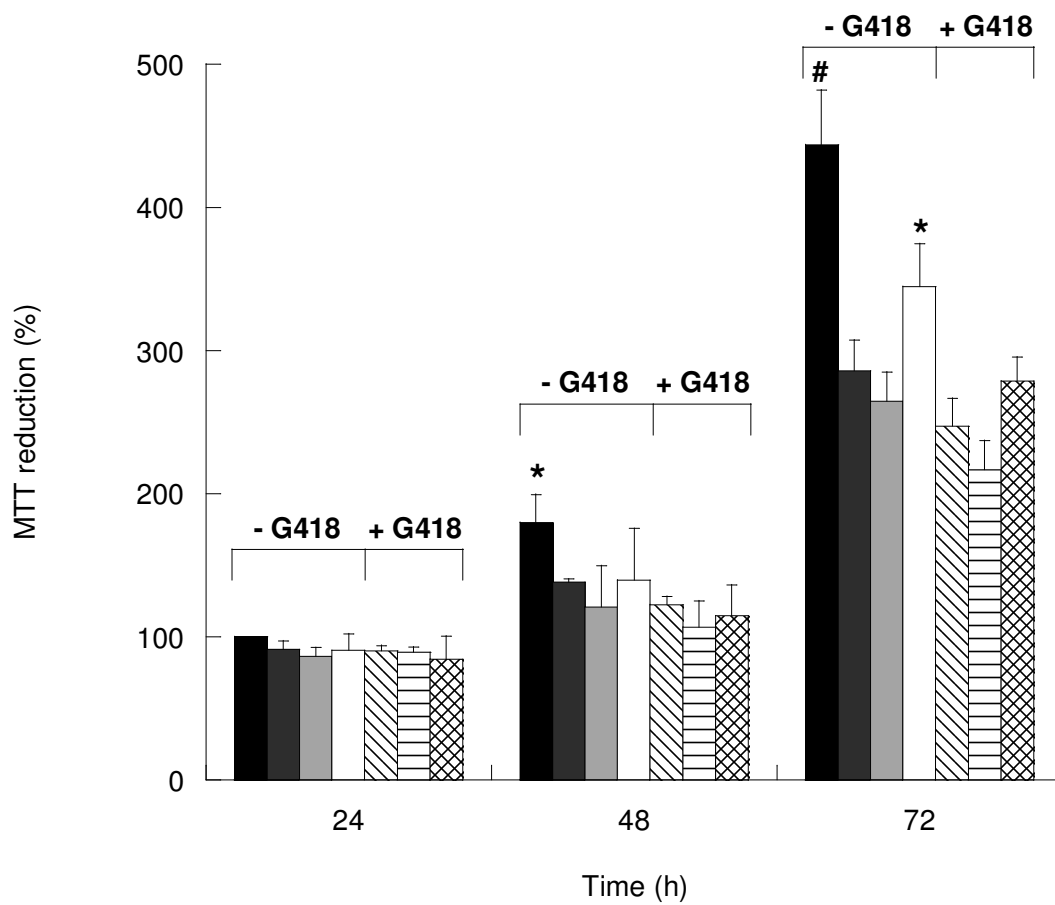

Supplement: pone.0013501.s004.pdf [file pone.0013501.s004.pdf]
